# Supplementary material
Source: PubMed Central journal article supplement (PMC5675716)
Supplement: NIHMS913084-supplement-supplemental_figures.pdf [file NIHMS913084-supplement-supplemental_figures.pdf]

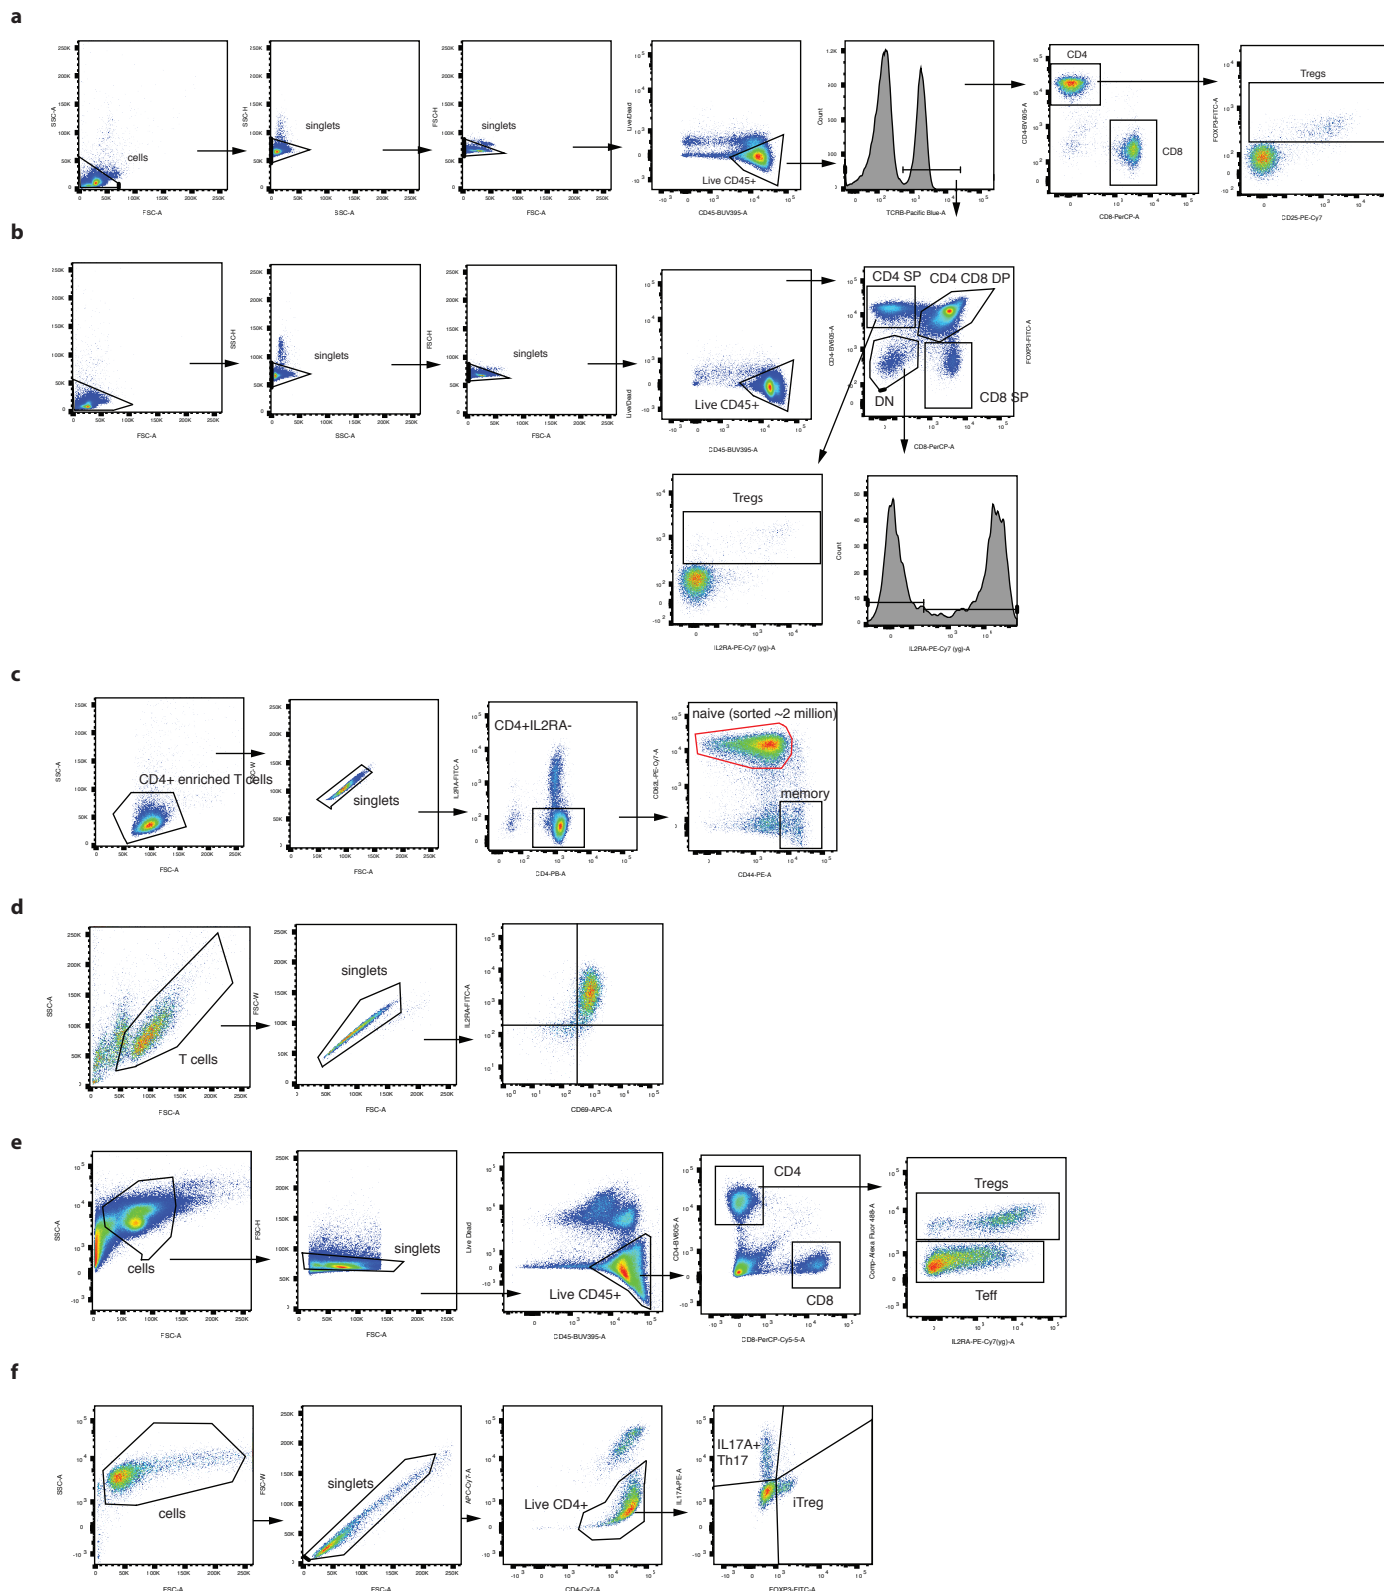

**Supplementary Info. Flow cytometry gating strategies.** (a) Gating strategy for mouse immunophenotyping of spleen. Data for peripheral and mesenteric lymph nodes, as well as large intestine were acquired and analyzed in a similar manner. (b) Thymus flow cytometry data. (c) Sort sort strategy for naive CD4+ T cells from spleen and peripheral lymph node negatively enriched for CD4+ T cells. (d) Example of naive CD4+ T cell activation staining. (e) FACS from anti-CD3 treated mice. (f) NOD EDEL naive CD4+ T cell differentiation flow cytometry gating.
